# Supplementary material
Source: PubMed Central journal article supplement (PMC4244876)
Supplement: CJP-2014-vol59-November-576-585-eTable1.pdf [file CJP-2014-vol59-November-576-585-eTable1.pdf]

Turner BJ, Austin SB, Chapman AL. Treating Nonsuicidal Self-Injury: A Systematic Review of Psychological and Pharmacological Interventions. *Can J Psychiatry*. 2014;59(11):576–585.

eTable 1: Empirical Studies of Treatment Effects on NSSI

| Study                                        | Diagnostic Group(s) | Sample                                           | Treatment                   | Comparison condition            | Type                      | Duration                     | Study Design | Key NSSI Findings                                                                                                                                                                                  |
|----------------------------------------------|---------------------|--------------------------------------------------|-----------------------------|---------------------------------|---------------------------|------------------------------|--------------|----------------------------------------------------------------------------------------------------------------------------------------------------------------------------------------------------|
| <b>Level I Evidence</b>                      |                     |                                                  |                             |                                 |                           |                              |              |                                                                                                                                                                                                    |
| Brent et al., 2009                           | MDD                 | N = 334 (70% female) adolescents (ages 12 to 18) | SSRI with or without CBT    | Venlafaxine with or without CBT | Meds with and without PTx | 12 weeks                     | RCT          | No differences between treatments conditions for NSSI occurrence.                                                                                                                                  |
| Goodyer et al., 2008; Wilkinson et al., 2011 | MDD                 | N = 164 (74% female) adolescents (ages 11 to 17) | CBT + SSRI and CM (n = 105) | SSRI and CM (n = 103)           | PTx + meds vs. meds only  | 12 weeks (16 week follow-up) | RCT          | Adding CBT to SSRI did not result in a significantly greater reduction in NSSI, compared to SSRI only. Neither treatment predicted likelihood of NSSI over the 28 weeks.                           |
| Gratz & Gunderson, 2006                      | BPD                 | N = 26 (100% female) adults (ages 19 to 58)      | ERGT + ongoing CM (n = 12)  | TAU (n = 10)                    | Group therapy, plus CM    | 14 weeks                     | RCT          | Greater decrease in NSSI frequency in ERGT, compared to TAU. 42% of patients receiving ERGT showed a decrease in NSSI frequency of 75% or greater, and 17% reduced their NSSI frequency by 45-57%. |

|                                  |                                                            |                                                                 |                                       |                         |                        |                              |     |                                                                                                                                                                                                                                                                                    |
|----------------------------------|------------------------------------------------------------|-----------------------------------------------------------------|---------------------------------------|-------------------------|------------------------|------------------------------|-----|------------------------------------------------------------------------------------------------------------------------------------------------------------------------------------------------------------------------------------------------------------------------------------|
| Gratz, Tull, & Levy, 2013        | Mostly BPD                                                 | N = 61 (100% female) adults (mean age = 33)                     | ERGT + TAU (n = 31)                   | TAU (n = 30)            | Group therapy, plus CM | 14 weeks (9 month follow-up) | RCT | ERGT resulted in significantly larger decreases in NSSI frequency.<br>> 35% of the patients in the ERGT achieved clinically significant changes in NSSI frequency.<br>NSSI frequency further decreased from post-tx to follow-up.<br>47% abstained from NSSI throughout follow-up. |
| Gregory et al., 2008             | BPD plus alcohol abuse or dependence                       | N = 30 (80% female) adults (ages 18 to 45)                      | DDP (n = 15)                          | TAU (n = 15)            | Ind. PTx.              | 12-18 months                 | RCT | 57.1% of participants had stopped NSSI at 12 months.<br>There was a significant decrease in NSSI frequency at 12 months.                                                                                                                                                           |
| Hassanian-Moghaddam et al., 2011 | Individuals who presented to hospital after self-poisoning | N = 2300 (66.4% female) adolescents and adults (ages 12 and up) | Postcard Intervention (n = 1150)      | TAU (n = 1150)          | Postcard intervention  | 12 months                    | RCT | There was no significant reduction in rates or frequency of self-cutting.                                                                                                                                                                                                          |
| Linehan et al., 2006             | Recent suicidal behaviour and NSSI                         | N = 101 (100% female) adults (ages 18 to 45)                    | DBT (n = 60)                          | CTBE (n = 51)           | Ind. and group PTx     | 12 months                    | RCT | Both treatments decreased number of episodes of NSSI, with no differences between treatments.                                                                                                                                                                                      |
| Linehan et al., 2008             | BPD                                                        | N = 24 (100% female) adults (ages 18 to 60)                     | Olanzapine (n = 12; 2.5 to 15 mg/day) | Placebo (n = 12) plus 6 | Meds (plus PTx)        | 6 months                     | RCT | Both groups significantly decreased NSSI frequency over tx.                                                                                                                                                                                                                        |

|                                                    |                                                                               |                                                                            |                                        |                              |                       |                                       |     |                                                                                                                                                                                                                                                                             |
|----------------------------------------------------|-------------------------------------------------------------------------------|----------------------------------------------------------------------------|----------------------------------------|------------------------------|-----------------------|---------------------------------------|-----|-----------------------------------------------------------------------------------------------------------------------------------------------------------------------------------------------------------------------------------------------------------------------------|
|                                                    |                                                                               |                                                                            | plus 6 months<br>of DBT                | months of<br>DBT             |                       |                                       |     | Trend ( $p < .10$ ) for greater<br>decreases in NSSI<br>frequency in the placebo<br>condition.                                                                                                                                                                              |
| McMain et<br>al., 2009                             | BPD, at<br>least two<br>SSI or NSSI<br>in the past 5<br>years                 | N = 180 (86%<br>female) adults<br>(ages 18 to 60)                          | DBT<br>(n = 90)                        | GPM<br>(n = 90)              | Ind. and<br>group PTx | 12 months                             | RCT | There was a significant<br>decrease in NSSI<br>frequency in both groups<br>(OR = .52), with no group<br>differences.                                                                                                                                                        |
| Nickel et al.,<br>2006;<br>Nickel, et<br>al., 2007 | BPD                                                                           | N = 52 (82.7%<br>female) adults<br>(age 16 and<br>older; mean<br>age 21.7) | Aripiprazole<br>(n = 26; 15<br>mg/day) | Placebo<br>(n = 26)          | Meds                  | 8 weeks<br>(18 month<br>follow-up)    | RCT | 71% meds patients<br>refrained from NSSI over<br>the course of treatment.<br>50% more patients in the<br>placebo group engaged in<br>NSSI at post-tx vs. pre-tx.<br>Over follow-up, 15% of<br>meds patients engaged in<br>NSSI. 42% of placebo<br>patients engaged in NSSI. |
| Pistorello et<br>al., 2012                         | $\geq 3$ DSM-<br>IV criteria<br>for BPD<br>plus<br>suicidality<br>and/or NSSI | N = 63 (81%<br>female) college<br>students (ages<br>18 to 25)              | DBT<br>(n = 31)                        | Optimized<br>TAU<br>(n = 32) | Ind. and<br>group PTx | 7-12 months<br>(6 month<br>follow-up) | RCT | No difference between<br>treatments in likelihood of<br>engaging in NSSI (DBT:<br>44.4%; O-TAU: 43.3%).<br>DBT condition showed<br>less frequent and greater<br>decrease in frequency of<br>NSSI compared to O-<br>TAU.                                                     |

|                                                  |                                      |                                             |                     |              |                    |                                |     |                                                                                                                                                                                                                          |
|--------------------------------------------------|--------------------------------------|---------------------------------------------|---------------------|--------------|--------------------|--------------------------------|-----|--------------------------------------------------------------------------------------------------------------------------------------------------------------------------------------------------------------------------|
| Verheul et al., 2003; van den Bosch et al., 2005 | BPD with and without substance abuse | N = 58 (100% female) adults (ages 18 to 65) | DBT (n = 27)        | TAU (n = 31) | Ind. and group PTx | 12 months (6 month follow-up)  | RCT | NSSI frequency decreased more from pre- to post-tx in the DBT group. At post-tx, 65% of the DBT group refrained from NSSI, versus 43% of the TAU group. Differences between treatments sustained at six-month follow-up. |
| Weinberg et al., 2006                            | BPD                                  | N = 30 (100% female) adults (ages 18 to 40) | MACT + TAU (n = 15) | TAU (n = 15) | Ind. PTx           | 6 sessions (6 month follow-up) | RCT | MACT had greater reduction in NSSI frequency post-tx and six-month follow-up.                                                                                                                                            |

**Level II-1 Evidence**

|                     |     |                                             |                |                           |      |           |                               |                                                                                                                                                                                                                          |
|---------------------|-----|---------------------------------------------|----------------|---------------------------|------|-----------|-------------------------------|--------------------------------------------------------------------------------------------------------------------------------------------------------------------------------------------------------------------------|
| Andion et al., 2012 | BPD | N = 51 (100% female) adults (ages 18 to 41) | Individual DBT | Individual plus Group DBT | PTx. | 12 months | Controlled trial (non-random) | Both treatments decreased NSSI at post-tx and follow-up. Both achieved clinically significant reductions in NSSI at post-tx (combined: 64.3%, ind. only: 45.9%) and follow-up (combined: 64.3%, individual only: 59.5%). |
|---------------------|-----|---------------------------------------------|----------------|---------------------------|------|-----------|-------------------------------|--------------------------------------------------------------------------------------------------------------------------------------------------------------------------------------------------------------------------|

|                      |       |                                                 |                                                   |                                                 |                    |                                               |                                |                                                                                                                                                         |
|----------------------|-------|-------------------------------------------------|---------------------------------------------------|-------------------------------------------------|--------------------|-----------------------------------------------|--------------------------------|---------------------------------------------------------------------------------------------------------------------------------------------------------|
| Stanley et al., 1998 | BPD   | N = 30 (100% female)                            | DBT (n = 15)                                      | TAU (n = 15)                                    | Ind. and group PTx | 6 months                                      | Non-random control trial       | DBT had greater decrease in NSSI frequency and NSSI urges at 12 weeks, compared TAU.                                                                    |
| Libal et al., 2005   | Mixed | N = 16 (100% female) adolescents (age 13 to 17) | Ziprasidone (40-80 mg/day; w/ or w/o SSRI) + PTx. | Alternative neuroleptic (w/ or w/o SSRI) + PTx. | Meds (plus PTx)    | Not reported. Mean length of stay = 130 days. | Non-random case-control design | 47.3% decrease in daily frequency of NSSI with ziprasidone. Greater reduction in NSSI frequency with ziprasidone than alternate neuroleptic medication. |

#### Level II-2 Evidence

|                             |                       |                                             |                         |      |                    |                              |          |                                                                                                                   |
|-----------------------------|-----------------------|---------------------------------------------|-------------------------|------|--------------------|------------------------------|----------|-------------------------------------------------------------------------------------------------------------------|
| Chen et al., 2008           | BPD + BED or BPD + BN | N = 8 (100% female) adults (ages 24 to 56)  | DBT for ED              | None | Ind. and group PTx | 6 months (6 month follow-up) | Pre-post | Decreases in NSSI frequency post-tx were small (d = .22) and medium (d = .58) at follow-up, but non-significant.  |
| Clarkin et al., 2001        | BPD                   | N = 23 (100% female) adults (ages 19 to 48) | TFP (n = 17 completers) | None | Ind. PTx           | 12 months                    | Pre-post | # of NSSI episodes did not decrease with TFP. Medical severity of NSSI decreased from pre-tx to post-tx.          |
| Federici & Wisniewski, 2013 | ED                    | N = 7 (100% female) adults (ages 20 to 31)  | DBT                     | None | Ind. and group PTx | 6 months                     | Pre-post | 71.4% ceased NSSI in the last month of treatment. 14.3% increased the frequency at NSSI from pre- to post-tx, and |

|                        |              |                                                 |                  |      |                                     |          |          |                                                                                                                                                                                                                                      |
|------------------------|--------------|-------------------------------------------------|------------------|------|-------------------------------------|----------|----------|--------------------------------------------------------------------------------------------------------------------------------------------------------------------------------------------------------------------------------------|
|                        |              |                                                 |                  |      |                                     |          |          | 14.3% reported no change.                                                                                                                                                                                                            |
| Geddes et al., 2013    | Not reported | N = 6 (100% female) adolescents (ages 14 to 15) | DBT              | None | Ind. and family PTx                 | 26 weeks | Pre-post | 83.3% ceased NSSI at post-tx. One patient had a 50% decrease in NSSI frequency.                                                                                                                                                      |
| Goldstein et al., 2007 | Bipolar      | N = 10 (80% female) adolescents (ages 14 to 18) | DBT + medication | None | Ind. and family PTx                 | 24 weeks | Pre-post | Of the 4 participants with NSSI, there was a large (d = .80) but non-significant decrease in rates of NSSI. No NSSI acts were reported in the final 3 months of treatment.                                                           |
| Gratz et al., 2006     | BPD          | N = 36 (78% female) adults (ages 18 to 57)      | Mixed PHP + IOP  | None | Ind., group, and family PTx. + meds | 3 months | Pre-post | The % of patients engaging in NSSI decreased by half after one month of tx. The % of patients engaging in NSSI was not different from admission to 3-month follow-up. 50% of patients reported abstinence from NSSI at three-months. |

|                          |                                   |                                              |                                                     |      |                    |                               |          |                                                                                                                                                                                                                        |
|--------------------------|-----------------------------------|----------------------------------------------|-----------------------------------------------------|------|--------------------|-------------------------------|----------|------------------------------------------------------------------------------------------------------------------------------------------------------------------------------------------------------------------------|
| Gratz & Tull, 2011       | Mostly BPD                        | N = 23 (100% female) adults (ages 18 to 50)  | ERGT + ongoing CM                                   | None | Group PTx + CM     | 14 weeks                      | Pre-post | NSSI frequency was significantly lower post-tx compared to pre-tx ( $h^2 = .31$ ). 70% reported a reduction in NSSI frequency of $\geq 50\%$ . 55% reported abstinence from NSSI during the last 7 weeks of treatment. |
| van Goethem et al., 2012 | BPD                               | N = 19 (84.2% female) adults (ages 24 to 64) | DBT (n = 11 completers)                             | None | Ind. and group PTx | 6 months                      | Pre-post | Many patients (86%) decreased at least one method of NSSI. 29% also increased at least one method of NSSI.                                                                                                             |
| Harned et al., 2012      | BPD, PTSD, and recent self-injury | N = 13 (100% female) adults (ages 18 to 60)  | DBT + PE                                            | None | Ind. and group PTx | 12 months (3 month follow-up) | Pre-post | No difference between PE and no PE on NSSI urges pre- to post-tx. 3 patients (27.3%) engaged in NSSI during the study period, and 2 (15.4%) engaged in NSSI during the PE phase of treatment.                          |
| Hayakawa, 2009           | BPD + wrist-cutting               | N = 13 (92% female) adults (ages 20 to 53)   | 15-minute assertiveness training sessions, biweekly | None | Ind. PTx           | Up to 4 years                 | Pre-post | 9 patients (69%) reduced the severity/frequency of their NSSI. 4 patients (30.7%) reported no NSSI during the final week of tx.                                                                                        |

|                          |                                    |                                                  |                                           |                                            |                                     |                                              |          |                                                                                                                                                 |
|--------------------------|------------------------------------|--------------------------------------------------|-------------------------------------------|--------------------------------------------|-------------------------------------|----------------------------------------------|----------|-------------------------------------------------------------------------------------------------------------------------------------------------|
| Hulbert & Thomas, 2007   | Mixed PD with history of self-harm | N = 27 (100% female) adults (ages 16 to 64)      | STP                                       | None                                       | Group PTx.                          | 6 months (12 month follow-up)                | Pre-post | There was no significant change in NSSI frequency. 37% of patients abstained from NSSI by 12-month follow-up.                                   |
| Markovitz & Wagner, 1995 | BPD                                | N = 7 (n =32 without NSSI) adults                | Venlafaxine (maximum dose 200 mg bid)     | None                                       | Meds                                | 12 weeks                                     | Pre-post | 5 patients (71.4%) abstained from NSSI after 12 weeks, while 2 (28.6%) continued NSSI.                                                          |
| Martin et al., 2013      | Not reported                       | N = 19 (100% female) young adults (age 16 to 25) | VMT                                       | Pre-treatment Waitlist                     | Group therapy                       | 10 weeks (10 week follow-up)                 | Pre-post | Frequency of NSSI significantly reduced from pre- to post-tx, and pre-tx to follow-up.                                                          |
| McDonnell et al., 2010   | Mixed                              | N = 106 (58% female) adolescents (ages 12 to 17) | DBT in long-term inpatient care (n = 106) | Historical case-matched controls (n = 104) | Ind. and/or group PTx and/or milieu | Not reported (12 month follow-up)            | Pre-post | Among youth with 3 or more episodes of NSSI, those who received DBT had lower rates of NSSI over at follow-up compared to historical controls.  |
| Nixon et al., 2003       | MDD and/or Dysthymia               | N = 9 (88.9% female) adolescents (mean age 15.7) | Auricular acupuncture                     | None                                       | Medical                             | 3 weeks; once per week (four week follow-up) | Pre-post | Frequency of NSSI significantly decreased from pre-tx to follow-up. Urges to self-injure did not significantly change from pre-tx to follow-up. |



|                      |       |                                                   |                                      |      |                    |                                                                                    |                                             |                                                                                                                                                                                                                                                       |
|----------------------|-------|---------------------------------------------------|--------------------------------------|------|--------------------|------------------------------------------------------------------------------------|---------------------------------------------|-------------------------------------------------------------------------------------------------------------------------------------------------------------------------------------------------------------------------------------------------------|
| Norelli et al., 2013 | Mixed | N = 6 (50% female) adults (ages 29 to 40)         | Buprenorphine (0.5-6 mg/day)         | None | Meds               | 14 days to 11 months                                                               | Pre-post                                    | 50% decreased their monthly frequency of NSSI episodes.<br>One patient completely abstained from NSSI during treatment.<br>Two patients did not reduce their in NSSI.                                                                                 |
| Sonne et al., 1996   | BPD   | N = 5 (100% female) adults (ages 26 to 36)        | Naltrexone (50 mg/day or 100 mg/day) | None | Meds               | One week (with one week baseline and one week follow-up)                           | Within-group controlled design A-B-A design | 4 (80%) of the patients refrained from NSSI during tx.<br>NSSI was less frequent during tx, compared to baseline and follow-up.<br>The number of days on which patients engaged in NSSI decreased by 60% from baseline to tx.                         |
| Stanley et al., 2007 | BPD   | N = 20 (85% female) adults (ages 18 to 49)        | DBT                                  | None | Ind. and group PTx | 6 months                                                                           | Pre-post                                    | Frequency of NSSI and strength of NSSI urges decreased following six-months of DBT.                                                                                                                                                                   |
| Walsh, 2006          | Mixed | N = 42 (73.8% female) adolescents (ages 13 to 19) | DBT adapted for inpatient program    | None | Ind. and group PTx | 7 to 20 months (mean = 12.3) versus 2 to 6 months (mean = 4.0) (6 month follow-up) | Pre-post                                    | Both conditions reduced NSSI frequency during tx compared to the six months pre-tx, and tx to 6 month post-tx.<br>97% of patients with longer duration tx remained abstinent from NSSI at follow-up, versus 77% of patients with shorter duration tx. |

### Level II-3 Evidence

|                        |           |                                         |                                                  |      |      |                           |                             |                                                                                                                                                                                        |
|------------------------|-----------|-----------------------------------------|--------------------------------------------------|------|------|---------------------------|-----------------------------|----------------------------------------------------------------------------------------------------------------------------------------------------------------------------------------|
| Markovitz et al., 1991 | Mixed PDs | N = 12 adults                           | Fluoxetine (80 mg/day)                           | None | Meds | 12 weeks                  | Open-label, non-blind trial | By nine weeks, 50% of patients stopped NSSI. Frequency of NSSI decreased 74%. The two patients who were still engaging in NSSI post-tx had reduced the frequency of their NSSI by 97%. |
| Roth et al., 1996      | Mixed     | N = 7 (100% female) adults (age 18 -50) | Naltrexone (50 mg/day) (no comparison condition) | None | Meds | Mean follow-up 10.7 weeks | Open-label trial            | 85.7% of patients stopped NSSI during active naltrexone treatment; 42.8% resumed NSSI when naltrexone was discontinued.                                                                |

*Notes.* BED = binge eating disorder. BN = bulimia nervosa. BPD = Borderline Personality Disorder. CBT = cognitive behavioural therapy. CTBE = community treatment by experts. CM = case management. DBT = dialectical behaviour therapy. DDP = dynamic deconstructive therapy. ED = eating disorder. ERGT = emotion regulation group therapy. GPM = general psychiatric management. Ind. = individual. IOP = intensive outpatient program. MACT = manual-assisted cognitive therapy. MDD = major depressive disorder. Meds = medication. PD = Personality Disorder. PHP = partial hospital program. PTSD = post-traumatic stress disorder. PTx = psychotherapy. SSRI = selective serotonin reuptake inhibitor. STP = spectrum group treatment program. TAU = treatment as usual. TFP = transference focused psychotherapy. Tx = treatment. VMT = voice movement therapy. WL = waitlist.
